# Supplementary material for: Empirical phenotyping and genome-wide association study reveal the association of panicle architecture with yield in Chenopodium quinoa
Source: Front Microbiol. 2024 Mar 18;15:1349239. doi: 10.3389/fmicb.2024.1349239 (PMC10982352; doi:10.3389/fmicb.2024.1349239)
Supplement: Supplementary file 2 [file Data_Sheet_1.xlsx]

## Sheet: Sheet1
Supplementary Table S6.		S7	A similarity matrix Based Nei's (1972) Genetic distance matrix of 72 quinoa plants
Pop ID	S425-01	S425-02	SD121-04	SD121-05	SD121-06	SD121-07	SD121-08	SD121-09	SD121-10	S391-01	SD122-02	SD122-03	SD122-04	SD122-05	SPrecm-01	SPrecm-02	SPrecm-03	SPrecm-04	SPrecm-05	SPrecm-06	SPrecm-07	S297-02	S128-01	S128-02	S128-03	S128-04	S128-05	S128-06	S128-07	S128-08	S128-09	S128-10	S33-01	S33-02	S33-03	S33-04	S33-05	S33-06	S33-07	S33-08	S33-09	S33-10	S470-01	S470-02	S470-03	S470-04	S470-05	S470-07	S470-08
S425-01	**** 0.9833 0.5667 0.6000 0.5667 0.6000 0.5667 0.6000 0.6000 0.4667 0.4500 0.5167 0.4000 0.5000 0.4167 0.5000 0.4500 0.5167 0.4333 0.4500 0.4833 0.4333 0.5000 0.5167 0.5000 0.5667 0.5167 0.5167 0.5167 0.5500 0.5333 0.5583 0.6167 0.6000 0.6000 0.5833 0.6000 0.6000 0.5833 0.6000 0.5833 0.5750 0.6000 0.5583 0.6000 0.5333 0.5750 0.5583 0.5917 0.5417 0.5500 0.4417 0.3667 0.3417 0.3667 0.3417 0.3750 0.…
S425-02	0.0168 **** 0.5833 0.6167 0.5833 0.6167 0.5833 0.6167 0.6167 0.4833 0.4333 0.5000 0.3833 0.4833 0.4333 0.5167 0.4667 0.5333 0.4500 0.4667 0.5000 0.4500 0.4833 0.5000 0.5167 0.5500 0.5000 0.5000 0.5333 0.5333 0.5500 0.5417 0.6000 0.5833 0.5833 0.6000 0.5833 0.6167 0.6000 0.5833 0.6000 0.5917 0.6167 0.5750 0.6167 0.5500 0.5917 0.5750 0.6083 0.5583 0.5667 0.4583 0.3833 0.3250 0.3500 0.3250 0.3583 0.…
SD121-04	0.5680 0.5390 **** 0.9667 1.0000 0.9667 1.0000 0.9667 0.9667 0.5667 0.5167 0.5167 0.5000 0.5333 0.4500 0.4667 0.4500 0.5500 0.4667 0.4833 0.4833 0.4000 0.5833 0.6000 0.5500 0.5500 0.5667 0.6000 0.5333 0.5333 0.5833 0.5250 0.4833 0.5000 0.4667 0.5167 0.5000 0.5000 0.4833 0.5000 0.4833 0.4750 0.6667 0.6250 0.6833 0.6167 0.6583 0.6250 0.6750 0.6250 0.6333 0.4417 0.3833 0.4250 0.4500 0.4250 0.4250 0.…
SD121-05	0.5108 0.4834 0.0339 **** 0.9667 1.0000 0.9667 1.0000 1.0000 0.5333 0.5500 0.5500 0.5000 0.5333 0.4833 0.5000 0.4833 0.5833 0.5000 0.5167 0.5167 0.4333 0.5500 0.5667 0.5167 0.5167 0.5333 0.5667 0.5000 0.5000 0.5500 0.4917 0.4500 0.4667 0.4333 0.4833 0.4667 0.4667 0.4500 0.4667 0.4500 0.4417 0.6333 0.5917 0.6500 0.5833 0.6250 0.5917 0.6417 0.5917 0.6000 0.4750 0.4167 0.4250 0.4500 0.4250 0.4583 0.…
SD121-06	0.5680 0.5390 0.0000 0.0339 **** 0.9667 1.0000 0.9667 0.9667 0.5667 0.5167 0.5167 0.5000 0.5333 0.4500 0.4667 0.4500 0.5500 0.4667 0.4833 0.4833 0.4000 0.5833 0.6000 0.5500 0.5500 0.5667 0.6000 0.5333 0.5333 0.5833 0.5250 0.4833 0.5000 0.4667 0.5167 0.5000 0.5000 0.4833 0.5000 0.4833 0.4750 0.6667 0.6250 0.6833 0.6167 0.6583 0.6250 0.6750 0.6250 0.6333 0.4417 0.3833 0.4250 0.4500 0.4250 0.4250 0.…
SD121-07	0.5108 0.4834 0.0339 0.0000 0.0339 **** 0.9667 1.0000 1.0000 0.5333 0.5500 0.5500 0.5000 0.5333 0.4833 0.5000 0.4833 0.5833 0.5000 0.5167 0.5167 0.4333 0.5500 0.5667 0.5167 0.5167 0.5333 0.5667 0.5000 0.5000 0.5500 0.4917 0.4500 0.4667 0.4333 0.4833 0.4667 0.4667 0.4500 0.4667 0.4500 0.4417 0.6333 0.5917 0.6500 0.5833 0.6250 0.5917 0.6417 0.5917 0.6000 0.4750 0.4167 0.4250 0.4500 0.4250 0.4583 0.…
SD121-08	0.5680 0.5390 0.0000 0.0339 0.0000 0.0339 **** 0.9667 0.9667 0.5667 0.5167 0.5167 0.5000 0.5333 0.4500 0.4667 0.4500 0.5500 0.4667 0.4833 0.4833 0.4000 0.5833 0.6000 0.5500 0.5500 0.5667 0.6000 0.5333 0.5333 0.5833 0.5250 0.4833 0.5000 0.4667 0.5167 0.5000 0.5000 0.4833 0.5000 0.4833 0.4750 0.6667 0.6250 0.6833 0.6167 0.6583 0.6250 0.6750 0.6250 0.6333 0.4417 0.3833 0.4250 0.4500 0.4250 0.4250 0.…
SD121-09	0.5108 0.4834 0.0339 0.0000 0.0339 0.0000 0.0339 **** 1.0000 0.5333 0.5500 0.5500 0.5000 0.5333 0.4833 0.5000 0.4833 0.5833 0.5000 0.5167 0.5167 0.4333 0.5500 0.5667 0.5167 0.5167 0.5333 0.5667 0.5000 0.5000 0.5500 0.4917 0.4500 0.4667 0.4333 0.4833 0.4667 0.4667 0.4500 0.4667 0.4500 0.4417 0.6333 0.5917 0.6500 0.5833 0.6250 0.5917 0.6417 0.5917 0.6000 0.4750 0.4167 0.4250 0.4500 0.4250 0.4583 0.…
SD121-10	0.5108 0.4834 0.0339 0.0000 0.0339 0.0000 0.0339 0.0000 **** 0.5333 0.5500 0.5500 0.5000 0.5333 0.4833 0.5000 0.4833 0.5833 0.5000 0.5167 0.5167 0.4333 0.5500 0.5667 0.5167 0.5167 0.5333 0.5667 0.5000 0.5000 0.5500 0.4917 0.4500 0.4667 0.4333 0.4833 0.4667 0.4667 0.4500 0.4667 0.4500 0.4417 0.6333 0.5917 0.6500 0.5833 0.6250 0.5917 0.6417 0.5917 0.6000 0.4750 0.4167 0.4250 0.4500 0.4250 0.4583 0.…
S391-01	0.7621 0.7270 0.5680 0.6286 0.5680 0.6286 0.5680 0.6286 0.6286 **** 0.5167 0.4500 0.5333 0.5000 0.4833 0.5000 0.4833 0.5167 0.5000 0.5167 0.5500 0.4667 0.6333 0.6167 0.6333 0.6000 0.6167 0.6167 0.6500 0.5833 0.6333 0.5917 0.6333 0.6500 0.6167 0.6333 0.6167 0.6500 0.6000 0.6167 0.6500 0.5917 0.5333 0.5083 0.5333 0.5333 0.5417 0.5083 0.5417 0.5250 0.5333 0.3750 0.3667 0.4750 0.5000 0.5083 0.4250 0.…
SD122-02	0.7985 0.8362 0.6604 0.5978 0.6604 0.5978 0.6604 0.5978 0.5978 0.6604 **** 0.9333 0.9167 0.8500 0.5333 0.5833 0.5000 0.5333 0.5500 0.5333 0.5000 0.5500 0.5500 0.5667 0.5167 0.5833 0.5667 0.5667 0.5333 0.5667 0.5500 0.5250 0.5333 0.5500 0.5500 0.5333 0.5500 0.5500 0.5333 0.5500 0.5667 0.5250 0.3833 0.3750 0.4000 0.4000 0.3917 0.3750 0.4083 0.3917 0.4167 0.5417 0.5833 0.6417 0.6167 0.7417 0.6417 0.…
SD122-03	0.6604 0.6931 0.6604 0.5978 0.6604 0.5978 0.6604 0.5978 0.5978 0.7985 0.0690 **** 0.8500 0.8833 0.5333 0.5833 0.5000 0.5667 0.5500 0.5333 0.5333 0.5167 0.5833 0.6000 0.5500 0.6167 0.6000 0.6000 0.5667 0.6000 0.5833 0.5583 0.6000 0.6167 0.6167 0.6000 0.6167 0.6167 0.6000 0.6167 0.6333 0.5917 0.4167 0.4083 0.4333 0.4333 0.4250 0.4083 0.4417 0.4250 0.4500 0.4750 0.5333 0.5750 0.5500 0.6917 0.5917 0.…
SD122-04	0.9163 0.9589 0.6931 0.6931 0.6931 0.6931 0.6931 0.6931 0.6931 0.6286 0.0870 0.1625 **** 0.8000 0.5167 0.5333 0.4833 0.4833 0.4667 0.5167 0.4833 0.5333 0.5333 0.5500 0.5000 0.5667 0.5500 0.5500 0.5167 0.5500 0.5333 0.5083 0.4833 0.5000 0.5000 0.4833 0.5000 0.5000 0.4833 0.5000 0.5167 0.4750 0.4000 0.3917 0.4167 0.4167 0.4083 0.3917 0.4250 0.4083 0.4333 0.5583 0.6000 0.6917 0.6667 0.7917 0.6917 0.…
SD122-05	0.6931 0.7270 0.6286 0.6286 0.6286 0.6286 0.6286 0.6286 0.6286 0.6931 0.1625 0.1241 0.2231 **** 0.5500 0.5667 0.5167 0.5833 0.5667 0.5500 0.5833 0.4333 0.6000 0.6167 0.5667 0.6333 0.6167 0.6167 0.5833 0.6167 0.6000 0.5750 0.6167 0.6333 0.6333 0.6167 0.6333 0.6333 0.6167 0.6333 0.6500 0.6083 0.4000 0.4250 0.4167 0.4500 0.4083 0.4250 0.4250 0.4417 0.4500 0.4583 0.5000 0.5917 0.6000 0.6750 0.5250 0.…
SPrecm-01	0.8755 0.8362 0.7985 0.7270 0.7985 0.7270 0.7985 0.7270 0.7270 0.7270 0.6286 0.6286 0.6604 0.5978 **** 0.9167 0.9000 0.8333 0.9500 0.8667 0.8667 0.5167 0.4500 0.4333 0.4500 0.4500 0.4667 0.4667 0.5000 0.4333 0.4500 0.4583 0.4667 0.4833 0.4500 0.5000 0.4833 0.4833 0.4667 0.4833 0.5000 0.4750 0.4833 0.5250 0.4833 0.5333 0.4917 0.5250 0.4750 0.5417 0.5167 0.6083 0.6167 0.5583 0.5667 0.5417 0.5917 0.…
SPrecm-02	0.6931 0.6604 0.7621 0.6931 0.7621 0.6931 0.7621 0.6931 0.6931 0.6931 0.5390 0.5390 0.6286 0.5680 0.0870 **** 0.8167 0.8500 0.9000 0.8833 0.8500 0.5333 0.5000 0.4833 0.4667 0.4667 0.4833 0.4833 0.4833 0.4500 0.4667 0.4417 0.5167 0.5333 0.5000 0.5500 0.5333 0.5333 0.5167 0.5333 0.5500 0.5250 0.5000 0.5417 0.5000 0.5500 0.5083 0.5417 0.4917 0.5583 0.5333 0.5583 0.5667 0.5083 0.5167 0.4917 0.5417 0.…
SPrecm-03	0.7985 0.7621 0.7985 0.7270 0.7985 0.7270 0.7985 0.7270 0.7270 0.7270 0.6931 0.6931 0.7270 0.6604 0.1054 0.2025 **** 0.7667 0.8500 0.8667 0.8333 0.4833 0.4833 0.4667 0.4833 0.4833 0.5000 0.5000 0.5333 0.4667 0.4833 0.4917 0.4667 0.4833 0.4500 0.5000 0.4833 0.4833 0.4667 0.4833 0.5000 0.4750 0.4833 0.5250 0.4833 0.5333 0.4917 0.5250 0.4750 0.5417 0.5167 0.6083 0.6167 0.5583 0.5667 0.5417 0.5917 0.…
SPrecm-04	0.6604 0.6286 0.5978 0.5390 0.5978 0.5390 0.5978 0.5390 0.5390 0.6604 0.6286 0.5680 0.7270 0.5390 0.1823 0.1625 0.2657 **** 0.8833 0.9000 0.9333 0.5500 0.5833 0.5667 0.5500 0.5500 0.5667 0.5667 0.5667 0.5333 0.5500 0.5250 0.5333 0.5500 0.5167 0.5667 0.5500 0.5500 0.5333 0.5500 0.5667 0.5417 0.5167 0.5583 0.5167 0.5667 0.5250 0.5583 0.5083 0.5750 0.5500 0.6083 0.5500 0.4583 0.4667 0.4417 0.4917 0.…
SPrecm-05	0.8362 0.7985 0.7621 0.6931 0.7621 0.6931 0.7621 0.6931 0.6931 0.6931 0.5978 0.5978 0.7621 0.5680 0.0513 0.1054 0.1625 0.1241 **** 0.8833 0.8833 0.5333 0.5000 0.4833 0.5000 0.5000 0.5167 0.5167 0.5500 0.4833 0.5000 0.5083 0.5167 0.5333 0.5000 0.5500 0.5333 0.5333 0.5167 0.5333 0.5500 0.5250 0.5000 0.5417 0.5000 0.5500 0.5083 0.5417 0.4917 0.5583 0.5333 0.5917 0.6000 0.5083 0.5167 0.4917 0.5417 0.…
SPrecm-06	0.7985 0.7621 0.7270 0.6604 0.7270 0.6604 0.7270 0.6604 0.6604 0.6604 0.6286 0.6286 0.6604 0.5978 0.1431 0.1241 0.1431 0.1054 0.1241 **** 0.9000 0.5167 0.5500 0.5333 0.5167 0.5167 0.5333 0.5333 0.5333 0.5000 0.5167 0.4917 0.5000 0.5167 0.4833 0.5333 0.5167 0.5167 0.5000 0.5167 0.5333 0.5083 0.5167 0.5583 0.5167 0.5667 0.5250 0.5583 0.5083 0.5750 0.5500 0.5750 0.5833 0.5250 0.5333 0.5083 0.5583 0.…
SPrecm-07	0.7270 0.6931 0.7270 0.6604 0.7270 0.6604 0.7270 0.6604 0.6604 0.5978 0.6931 0.6286 0.7270 0.5390 0.1431 0.1625 0.1823 0.0690 0.1241 0.1054 **** 0.4833 0.5833 0.5667 0.5500 0.5500 0.5667 0.5667 0.5667 0.5333 0.5500 0.5250 0.5333 0.5500 0.5167 0.5667 0.5500 0.5500 0.5333 0.5500 0.5667 0.5417 0.5500 0.5917 0.5500 0.6000 0.5583 0.5917 0.5417 0.6083 0.5833 0.5417 0.5500 0.4583 0.4667 0.4417 0.4917 0.…
S297-02	0.8362 0.7985 0.9163 0.8362 0.9163 0.8362 0.9163 0.8362 0.8362 0.7621 0.5978 0.6604 0.6286 0.8362 0.6604 0.6286 0.7270 0.5978 0.6286 0.6604 0.7270 **** 0.4333 0.4167 0.4667 0.4667 0.4167 0.4500 0.4833 0.4500 0.4667 0.4917 0.4500 0.4333 0.4667 0.4833 0.4667 0.4667 0.5167 0.4667 0.4833 0.5083 0.3000 0.3417 0.2833 0.3500 0.3083 0.3417 0.2917 0.3417 0.3167 0.5583 0.5000 0.6417 0.6167 0.6083 0.6417 0.…
S128-01	0.6931 0.7270 0.5390 0.5978 0.5390 0.5978 0.5390 0.5978 0.5978 0.4568 0.5978 0.5390 0.6286 0.5108 0.7985 0.6931 0.7270 0.5390 0.6931 0.5978 0.5390 0.8362 **** 0.9833 0.9333 0.9000 0.9500 0.9500 0.8833 0.9167 0.9000 0.8750 0.5833 0.6000 0.5667 0.5833 0.6000 0.5667 0.5500 0.6000 0.5833 0.5417 0.6000 0.5750 0.6000 0.5667 0.5917 0.5583 0.5750 0.5750 0.5667 0.3917 0.4167 0.5083 0.5000 0.5250 0.4250 0.…
S128-02	0.6604 0.6931 0.5108 0.5680 0.5108 0.5680 0.5108 0.5680 0.5680 0.4834 0.5680 0.5108 0.5978 0.4834 0.8362 0.7270 0.7621 0.5680 0.7270 0.6286 0.5680 0.8755 0.0168 **** 0.9167 0.9167 0.9667 0.9667 0.8667 0.9333 0.9167 0.8583 0.6000 0.6167 0.5833 0.6000 0.6167 0.5833 0.5667 0.6167 0.6000 0.5583 0.5833 0.5583 0.5833 0.5500 0.5750 0.5417 0.5583 0.5583 0.5500 0.4083 0.4333 0.5250 0.5167 0.5417 0.4417 0.…
S128-03	0.6931 0.6604 0.5978 0.6604 0.5978 0.6604 0.5978 0.6604 0.6604 0.4568 0.6604 0.5978 0.6931 0.5680 0.7985 0.7621 0.7270 0.5978 0.6931 0.6604 0.5978 0.7621 0.0690 0.0870 **** 0.8667 0.8833 0.8833 0.9500 0.8833 0.9333 0.8750 0.5833 0.5667 0.5667 0.5500 0.5333 0.5667 0.5500 0.5333 0.5833 0.5417 0.5667 0.5417 0.5667 0.5333 0.5583 0.5250 0.5417 0.5417 0.5333 0.3917 0.4167 0.4750 0.4667 0.4917 0.3917 0.…
S128-04	0.5680 0.5978 0.5978 0.6604 0.5978 0.6604 0.5978 0.6604 0.6604 0.5108 0.5390 0.4834 0.5680 0.4568 0.7985 0.7621 0.7270 0.5978 0.6931 0.6604 0.5978 0.7621 0.1054 0.0870 0.1431 **** 0.9500 0.9500 0.9167 0.9833 0.9333 0.9417 0.6167 0.6000 0.6000 0.6167 0.6333 0.6000 0.6167 0.6333 0.6167 0.6083 0.5000 0.4750 0.5000 0.4667 0.4917 0.4583 0.4750 0.4750 0.4667 0.4250 0.4500 0.5417 0.5333 0.5583 0.4583 0.…
S128-05	0.6604 0.6931 0.5680 0.6286 0.5680 0.6286 0.5680 0.6286 0.6286 0.4834 0.5680 0.5108 0.5978 0.4834 0.7621 0.7270 0.6931 0.5680 0.6604 0.6286 0.5680 0.8755 0.0513 0.0339 0.1241 0.0513 **** 0.9667 0.9000 0.9667 0.9167 0.8917 0.6000 0.6167 0.5833 0.6000 0.6167 0.5833 0.5667 0.6167 0.6000 0.5583 0.5500 0.5250 0.5500 0.5167 0.5417 0.5083 0.5250 0.5250 0.5167 0.4417 0.4667 0.5250 0.5167 0.5417 0.4417 0.…
S128-06	0.6604 0.6931 0.5108 0.5680 0.5108 0.5680 0.5108 0.5680 0.5680 0.4834 0.5680 0.5108 0.5978 0.4834 0.7621 0.7270 0.6931 0.5680 0.6604 0.6286 0.5680 0.7985 0.0513 0.0339 0.1241 0.0513 0.0339 **** 0.9000 0.9333 0.9500 0.8917 0.6000 0.6167 0.5833 0.6000 0.6167 0.5833 0.5667 0.6167 0.6000 0.5583 0.5500 0.5250 0.5500 0.5167 0.5417 0.5083 0.5250 0.5250 0.5167 0.4083 0.4333 0.5583 0.5500 0.5750 0.4750 0.…
S128-07	0.6604 0.6286 0.6286 0.6931 0.6286 0.6931 0.6286 0.6931 0.6931 0.4308 0.6286 0.5680 0.6604 0.5390 0.6931 0.7270 0.6286 0.5680 0.5978 0.6286 0.5680 0.7270 0.1241 0.1431 0.0513 0.0870 0.1054 0.1054 **** 0.9000 0.9500 0.9250 0.6000 0.5833 0.5833 0.5667 0.5500 0.5833 0.5667 0.5500 0.6000 0.5583 0.5167 0.4917 0.5167 0.4833 0.5083 0.4750 0.4917 0.4917 0.4833 0.4083 0.4333 0.4917 0.4833 0.5083 0.4083 0.…
S128-08	0.5978 0.6286 0.6286 0.6931 0.6286 0.6931 0.6286 0.6931 0.6931 0.5390 0.5680 0.5108 0.5978 0.4834 0.8362 0.7985 0.7621 0.6286 0.7270 0.6931 0.6286 0.7985 0.0870 0.0690 0.1241 0.0168 0.0339 0.0690 0.1054 **** 0.9167 0.9250 0.6000 0.5833 0.5833 0.6000 0.6167 0.5833 0.6000 0.6167 0.6000 0.5917 0.5167 0.4917 0.5167 0.4833 0.5083 0.4750 0.4917 0.4917 0.4833 0.4417 0.4667 0.5250 0.5167 0.5417 0.4417 0.…
S128-09	0.6286 0.5978 0.5390 0.5978 0.5390 0.5978 0.5390 0.5978 0.5978 0.4568 0.5978 0.5390 0.6286 0.5108 0.7985 0.7621 0.7270 0.5978 0.6931 0.6604 0.5978 0.7621 0.1054 0.0870 0.0690 0.0690 0.0870 0.0513 0.0513 0.0870 **** 0.8750 0.6167 0.6000 0.6000 0.5833 0.5667 0.6000 0.5833 0.5667 0.6167 0.5750 0.5333 0.5083 0.5333 0.5000 0.5250 0.4917 0.5083 0.5083 0.5000 0.3917 0.4167 0.5083 0.5000 0.5250 0.4250 0.…
S128-10	0.5828 0.6131 0.6444 0.7100 0.6444 0.7100 0.6444 0.7100 0.7100 0.5248 0.6444 0.5828 0.6766 0.5534 0.7802 0.8172 0.7100 0.6444 0.6766 0.7100 0.6444 0.7100 0.1335 0.1528 0.1335 0.0601 0.1147 0.1147 0.0780 0.0780 0.1335 **** 0.5750 0.5917 0.5583 0.6083 0.5917 0.5917 0.5750 0.6250 0.5750 0.6000 0.5250 0.5000 0.5250 0.4917 0.5167 0.4833 0.5000 0.5000 0.4917 0.4167 0.4250 0.5167 0.5083 0.5333 0.4333 0.…
S33-01	0.4834 0.5108 0.7270 0.7985 0.7270 0.7985 0.7270 0.7985 0.7985 0.4568 0.6286 0.5108 0.7270 0.4834 0.7621 0.6604 0.7621 0.6286 0.6604 0.6931 0.6286 0.7985 0.5390 0.5108 0.5390 0.4834 0.5108 0.5108 0.5108 0.5108 0.4834 0.5534 **** 0.9500 0.9833 0.9000 0.9500 0.9167 0.9333 0.9167 0.9333 0.8917 0.5500 0.5917 0.5333 0.5667 0.5583 0.5750 0.5250 0.5583 0.5333 0.3917 0.3833 0.4583 0.4667 0.4750 0.4583 0.…
S33-02	0.5108 0.5390 0.6931 0.7621 0.6931 0.7621 0.6931 0.7621 0.7621 0.4308 0.5978 0.4834 0.6931 0.4568 0.7270 0.6286 0.7270 0.5978 0.6286 0.6604 0.5978 0.8362 0.5108 0.4834 0.5680 0.5108 0.4834 0.4834 0.5390 0.5390 0.5108 0.5248 0.0513 **** 0.9333 0.9500 0.9333 0.9667 0.8833 0.9667 0.9500 0.9083 0.5667 0.6083 0.5500 0.6000 0.5750 0.5917 0.5417 0.5917 0.5667 0.3917 0.3833 0.4750 0.4833 0.4917 0.4750 0.…
S33-03	0.5108 0.5390 0.7621 0.8362 0.7621 0.8362 0.7621 0.8362 0.8362 0.4834 0.5978 0.4834 0.6931 0.4568 0.7985 0.6931 0.7985 0.6604 0.6931 0.7270 0.6604 0.7621 0.5680 0.5390 0.5680 0.5108 0.5390 0.5390 0.5390 0.5390 0.5108 0.5828 0.0168 0.0690 **** 0.8833 0.9333 0.9000 0.9500 0.9000 0.9167 0.9083 0.5333 0.5750 0.5167 0.5500 0.5417 0.5583 0.5083 0.5417 0.5167 0.4083 0.4000 0.4750 0.4833 0.4917 0.4750 0.…
S33-04	0.5390 0.5108 0.6604 0.7270 0.6604 0.7270 0.6604 0.7270 0.7270 0.4568 0.6286 0.5108 0.7270 0.4834 0.6931 0.5978 0.6931 0.5680 0.5978 0.6286 0.5680 0.7270 0.5390 0.5108 0.5978 0.4834 0.5108 0.5108 0.5680 0.5108 0.5390 0.4970 0.1054 0.0513 0.1241 **** 0.9500 0.9833 0.9333 0.9833 0.9667 0.9583 0.5833 0.6250 0.5667 0.6167 0.5917 0.6083 0.5583 0.6083 0.5833 0.4417 0.4333 0.4917 0.5000 0.5083 0.4917 0.…
S33-05	0.5108 0.5390 0.6931 0.7621 0.6931 0.7621 0.6931 0.7621 0.7621 0.4834 0.5978 0.4834 0.6931 0.4568 0.7270 0.6286 0.7270 0.5978 0.6286 0.6604 0.5978 0.7621 0.5108 0.4834 0.6286 0.4568 0.4834 0.4834 0.5978 0.4834 0.5680 0.5248 0.0513 0.0690 0.0690 0.0513 **** 0.9333 0.9500 0.9667 0.9500 0.9083 0.5667 0.6083 0.5500 0.5833 0.5750 0.5917 0.5417 0.5750 0.5500 0.4417 0.4333 0.5083 0.5167 0.5250 0.5083 0.…
S33-06	0.5108 0.4834 0.6931 0.7621 0.6931 0.7621 0.6931 0.7621 0.7621 0.4308 0.5978 0.4834 0.6931 0.4568 0.7270 0.6286 0.7270 0.5978 0.6286 0.6604 0.5978 0.7621 0.5680 0.5390 0.5680 0.5108 0.5390 0.5390 0.5390 0.5390 0.5108 0.5248 0.0870 0.0339 0.1054 0.0168 0.0690 **** 0.9167 0.9667 0.9833 0.9417 0.5667 0.6083 0.5500 0.6000 0.5750 0.5917 0.5417 0.5917 0.5667 0.4250 0.4167 0.4750 0.4833 0.4917 0.4750 0.…
S33-07	0.5390 0.5108 0.7270 0.7985 0.7270 0.7985 0.7270 0.7985 0.7985 0.5108 0.6286 0.5108 0.7270 0.4834 0.7621 0.6604 0.7621 0.6286 0.6604 0.6931 0.6286 0.6604 0.5978 0.5680 0.5978 0.4834 0.5680 0.5680 0.5680 0.5108 0.5390 0.5534 0.0690 0.1241 0.0513 0.0690 0.0513 0.0870 **** 0.9167 0.9333 0.9583 0.5500 0.5917 0.5333 0.5667 0.5583 0.5750 0.5250 0.5583 0.5333 0.4583 0.4500 0.4917 0.5000 0.5083 0.4917 0.…
S33-08	0.5108 0.5390 0.6931 0.7621 0.6931 0.7621 0.6931 0.7621 0.7621 0.4834 0.5978 0.4834 0.6931 0.4568 0.7270 0.6286 0.7270 0.5978 0.6286 0.6604 0.5978 0.7621 0.5108 0.4834 0.6286 0.4568 0.4834 0.4834 0.5978 0.4834 0.5680 0.4700 0.0870 0.0339 0.1054 0.0168 0.0339 0.0339 0.0870 **** 0.9500 0.9417 0.5667 0.6083 0.5500 0.6000 0.5750 0.5917 0.5417 0.5917 0.5667 0.4250 0.4167 0.5083 0.5167 0.5250 0.5083 0.…
S33-09	0.5390 0.5108 0.7270 0.7985 0.7270 0.7985 0.7270 0.7985 0.7985 0.4308 0.5680 0.4568 0.6604 0.4308 0.6931 0.5978 0.6931 0.5680 0.5978 0.6286 0.5680 0.7270 0.5390 0.5108 0.5390 0.4834 0.5108 0.5108 0.5108 0.5108 0.4834 0.5534 0.0690 0.0513 0.0870 0.0339 0.0513 0.0168 0.0690 0.0513 **** 0.9250 0.5500 0.5917 0.5333 0.5833 0.5583 0.5750 0.5250 0.5750 0.5500 0.4417 0.4333 0.4917 0.5000 0.5083 0.4917 0.…
S33-10	0.5534 0.5248 0.7444 0.8172 0.7444 0.8172 0.7444 0.8172 0.8172 0.5248 0.6444 0.5248 0.7444 0.4970 0.7444 0.6444 0.7444 0.6131 0.6444 0.6766 0.6131 0.6766 0.6131 0.5828 0.6131 0.4970 0.5828 0.5828 0.5828 0.5248 0.5534 0.5108 0.1147 0.0961 0.0961 0.0426 0.0961 0.0601 0.0426 0.0601 0.0780 **** 0.5583 0.6000 0.5417 0.5917 0.5667 0.5833 0.5333 0.5833 0.5583 0.4500 0.4417 0.4833 0.4917 0.5000 0.4833 0.…
S470-01	0.5108 0.4834 0.4055 0.4568 0.4055 0.4568 0.4055 0.4568 0.4568 0.6286 0.9589 0.8755 0.9163 0.9163 0.7270 0.6931 0.7270 0.6604 0.6931 0.6604 0.5978 1.2040 0.5108 0.5390 0.5680 0.6931 0.5978 0.5978 0.6604 0.6604 0.6286 0.6444 0.5978 0.5680 0.6286 0.5390 0.5680 0.5680 0.5978 0.5680 0.5978 0.5828 **** 0.9583 0.9667 0.9167 0.9750 0.9417 0.9417 0.9250 0.9333 0.4083 0.4667 0.3583 0.3500 0.3750 0.3750 0.…
S470-02	0.5828 0.5534 0.4700 0.5248 0.4700 0.5248 0.4700 0.5248 0.5248 0.6766 0.9808 0.8957 0.9373 0.8557 0.6444 0.6131 0.6444 0.5828 0.6131 0.5828 0.5248 1.0739 0.5534 0.5828 0.6131 0.7444 0.6444 0.6444 0.7100 0.7100 0.6766 0.6931 0.5248 0.4970 0.5534 0.4700 0.4970 0.4970 0.5248 0.4970 0.5248 0.5108 0.0426 **** 0.9250 0.9583 0.9500 0.9833 0.9000 0.9667 0.9250 0.4333 0.4917 0.4000 0.3750 0.3833 0.3833 0.…
S470-03	0.5108 0.4834 0.3808 0.4308 0.3808 0.4308 0.3808 0.4308 0.4308 0.6286 0.9163 0.8362 0.8755 0.8755 0.7270 0.6931 0.7270 0.6604 0.6931 0.6604 0.5978 1.2611 0.5108 0.5390 0.5680 0.6931 0.5978 0.5978 0.6604 0.6604 0.6286 0.6444 0.6286 0.5978 0.6604 0.5680 0.5978 0.5978 0.6286 0.5978 0.6286 0.6131 0.0339 0.0780 **** 0.9000 0.9417 0.9083 0.9750 0.9083 0.9333 0.4083 0.4833 0.3750 0.3667 0.3917 0.3917 0.…
S470-04	0.6286 0.5978 0.4834 0.5390 0.4834 0.5390 0.4834 0.5390 0.5390 0.6286 0.9163 0.8362 0.8755 0.7985 0.6286 0.5978 0.6286 0.5680 0.5978 0.5680 0.5108 1.0498 0.5680 0.5978 0.6286 0.7621 0.6604 0.6604 0.7270 0.7270 0.6931 0.7100 0.5680 0.5108 0.5978 0.4834 0.5390 0.5108 0.5680 0.5108 0.5390 0.5248 0.0870 0.0426 0.1054 **** 0.9417 0.9750 0.9250 0.9917 0.9667 0.4250 0.4833 0.4417 0.4167 0.4250 0.4250 0.…
S470-05	0.5534 0.5248 0.4180 0.4700 0.4180 0.4700 0.4180 0.4700 0.4700 0.6131 0.9373 0.8557 0.8957 0.8957 0.7100 0.6766 0.7100 0.6444 0.6766 0.6444 0.5828 1.1766 0.5248 0.5534 0.5828 0.7100 0.6131 0.6131 0.6766 0.6766 0.6444 0.6604 0.5828 0.5534 0.6131 0.5248 0.5534 0.5534 0.5828 0.5534 0.5828 0.5680 0.0253 0.0513 0.0601 0.0601 **** 0.9500 0.9500 0.9333 0.9417 0.4000 0.4583 0.3833 0.3750 0.4000 0.4000 0.…
S470-07	0.5828 0.5534 0.4700 0.5248 0.4700 0.5248 0.4700 0.5248 0.5248 0.6766 0.9808 0.8957 0.9373 0.8557 0.6444 0.6131 0.6444 0.5828 0.6131 0.5828 0.5248 1.0739 0.5828 0.6131 0.6444 0.7802 0.6766 0.6766 0.7444 0.7444 0.7100 0.7270 0.5534 0.5248 0.5828 0.4970 0.5248 0.5248 0.5534 0.5248 0.5534 0.5390 0.0601 0.0168 0.0961 0.0253 0.0513 **** 0.9167 0.9833 0.9417 0.4333 0.4917 0.4167 0.3917 0.4000 0.4000 0.…
S470-08	0.5248 0.4970 0.3930 0.4437 0.3930 0.4437 0.3930 0.4437 0.4437 0.6131 0.8957 0.8172 0.8557 0.8557 0.7444 0.7100 0.7444 0.6766 0.7100 0.6766 0.6131 1.2321 0.5534 0.5828 0.6131 0.7444 0.6444 0.6444 0.7100 0.7100 0.6766 0.6931 0.6444 0.6131 0.6766 0.5828 0.6131 0.6131 0.6444 0.6131 0.6444 0.6286 0.0601 0.1054 0.0253 0.0780 0.0513 0.0870 **** 0.9167 0.9583 0.4000 0.4750 0.4000 0.3917 0.4167 0.4167 0.…
S470-09	0.6131 0.5828 0.4700 0.5248 0.4700 0.5248 0.4700 0.5248 0.5248 0.6444 0.9373 0.8557 0.8957 0.8172 0.6131 0.5828 0.6131 0.5534 0.5828 0.5534 0.4970 1.0739 0.5534 0.5828 0.6131 0.7444 0.6444 0.6444 0.7100 0.7100 0.6766 0.6931 0.5828 0.5248 0.6131 0.4970 0.5534 0.5248 0.5828 0.5248 0.5534 0.5390 0.0780 0.0339 0.0961 0.0084 0.0690 0.0168 0.0870 **** 0.9583 0.4333 0.4917 0.4333 0.4083 0.4167 0.4167 0.…
S470-10	0.5978 0.5680 0.4568 0.5108 0.4568 0.5108 0.4568 0.5108 0.5108 0.6286 0.8755 0.7985 0.8362 0.7985 0.6604 0.6286 0.6604 0.5978 0.6286 0.5978 0.5390 1.1499 0.5680 0.5978 0.6286 0.7621 0.6604 0.6604 0.7270 0.7270 0.6931 0.7100 0.6286 0.5680 0.6604 0.5390 0.5978 0.5680 0.6286 0.5680 0.5978 0.5828 0.0690 0.0780 0.0690 0.0339 0.0601 0.0601 0.0426 0.0426 **** 0.4250 0.4833 0.4250 0.4167 0.4250 0.4250 0.…
SRUrecm-01	0.8172 0.7802 0.8172 0.7444 0.8172 0.7444 0.8172 0.7444 0.7444 0.9808 0.6131 0.7444 0.5828 0.7802 0.4970 0.5828 0.4970 0.4970 0.5248 0.5534 0.6131 0.5828 0.9373 0.8957 0.9373 0.8557 0.8172 0.8957 0.8957 0.8172 0.9373 0.8755 0.9373 0.9373 0.8957 0.8172 0.8172 0.8557 0.7802 0.8557 0.8172 0.7985 0.8957 0.8362 0.8957 0.8557 0.9163 0.8362 0.9163 0.8362 0.8557 **** 0.8583 0.5667 0.5750 0.5667 0.5833 0.…
SRUrecm-02	1.0033 0.9589 0.9589 0.8755 0.9589 0.8755 0.9589 0.8755 0.8755 1.0033 0.5390 0.6286 0.5108 0.6931 0.4834 0.5680 0.4834 0.5978 0.5108 0.5390 0.5978 0.6931 0.8755 0.8362 0.8755 0.7985 0.7621 0.8362 0.8362 0.7621 0.8755 0.8557 0.9589 0.9589 0.9163 0.8362 0.8362 0.8755 0.7985 0.8755 0.8362 0.8172 0.7621 0.7100 0.7270 0.7270 0.7802 0.7100 0.7444 0.7100 0.7270 0.1528 **** 0.5917 0.6167 0.5917 0.5917 0.…
SPMrecm-01	1.0739 1.1239 0.8557 0.8557 0.8557 0.8557 0.8557 0.8557 0.8557 0.7444 0.4437 0.5534 0.3687 0.5248 0.5828 0.6766 0.5828 0.7802 0.6766 0.6444 0.7802 0.4437 0.6766 0.6444 0.7444 0.6131 0.6444 0.5828 0.7100 0.6444 0.6766 0.6604 0.7802 0.7444 0.7444 0.7100 0.6766 0.7444 0.7100 0.6766 0.7100 0.7270 1.0263 0.9163 0.9808 0.8172 0.9589 0.8755 0.9163 0.8362 0.8557 0.5680 0.5248 **** 0.9583 0.8500 0.8667 0.…
SPMrecm-02	1.0033 1.0498 0.7985 0.7985 0.7985 0.7985 0.7985 0.7985 0.7985 0.6931 0.4834 0.5978 0.4055 0.5108 0.5680 0.6604 0.5680 0.7621 0.6604 0.6286 0.7621 0.4834 0.6931 0.6604 0.7621 0.6286 0.6604 0.5978 0.7270 0.6604 0.6931 0.6766 0.7621 0.7270 0.7270 0.6931 0.6604 0.7270 0.6931 0.6604 0.6931 0.7100 1.0498 0.9808 1.0033 0.8755 0.9808 0.9373 0.9373 0.8957 0.8755 0.5534 0.4834 0.0426 **** 0.8083 0.8417 0.…
SPMrecm-03	1.0739 1.1239 0.8557 0.8557 0.8557 0.8557 0.8557 0.8557 0.8557 0.6766 0.2989 0.3687 0.2336 0.3930 0.6131 0.7100 0.6131 0.8172 0.7100 0.6766 0.8172 0.4970 0.6444 0.6131 0.7100 0.5828 0.6131 0.5534 0.6766 0.6131 0.6444 0.6286 0.7444 0.7100 0.7100 0.6766 0.6444 0.7100 0.6766 0.6444 0.6766 0.6931 0.9808 0.9589 0.9373 0.8557 0.9163 0.9163 0.8755 0.8755 0.8557 0.5680 0.5248 0.1625 0.2128 **** 0.8167 0.…
SPMrecm-04	0.9808 1.0263 0.8557 0.7802 0.8557 0.7802 0.8557 0.7802 0.7802 0.8557 0.4437 0.5248 0.3687 0.6444 0.5248 0.6131 0.5248 0.7100 0.6131 0.5828 0.7100 0.4437 0.8557 0.8172 0.9373 0.7802 0.8172 0.7444 0.8957 0.8172 0.8557 0.8362 0.7802 0.7444 0.7444 0.7100 0.6766 0.7444 0.7100 0.6766 0.7100 0.7270 0.9808 0.9589 0.9373 0.8557 0.9163 0.9163 0.8755 0.8755 0.8557 0.5390 0.5248 0.1431 0.1724 0.2025 **** 0.…
SJrecm-01	0.7802 0.7444 0.9808 0.8957 0.9808 0.8957 0.9808 0.8957 0.8957 0.7100 0.4970 0.4970 0.5248 0.4180 0.3687 0.4437 0.3216 0.4700 0.3930 0.3687 0.4700 0.5534 0.7802 0.8172 0.7100 0.7802 0.7444 0.8172 0.6766 0.7444 0.7802 0.7621 0.6444 0.6131 0.6131 0.5828 0.6131 0.5534 0.5828 0.6131 0.5248 0.5978 0.9373 0.8362 0.9373 0.8172 0.8755 0.8362 0.9163 0.8362 0.8557 0.5680 0.6131 0.5108 0.4970 0.4834 0.4568 …
SJrecm-02	0.7985 0.7621 0.9589 0.8755 0.9589 0.8755 0.9589 0.8755 0.8755 0.6604 0.6286 0.6286 0.5978 0.5390 0.4055 0.4834 0.3567 0.4568 0.4308 0.3567 0.4568 0.5390 0.7270 0.7621 0.6604 0.7270 0.6931 0.7621 0.6286 0.6931 0.7270 0.6766 0.7621 0.7270 0.7270 0.6931 0.7270 0.6604 0.6931 0.7270 0.6286 0.6766 0.8755 0.7802 0.8755 0.7621 0.8172 0.7802 0.8557 0.7802 0.7985 0.4970 0.5680 0.4700 0.4568 0.5534 0.5248 …
SJrecm-03	0.7985 0.7621 1.0498 0.9589 1.0498 0.9589 1.0498 0.9589 0.9589 0.8755 0.5680 0.5680 0.5978 0.4834 0.3567 0.4308 0.3102 0.4568 0.3808 0.3567 0.4568 0.5978 0.8755 0.9163 0.7985 0.8755 0.8362 0.9163 0.7621 0.8362 0.8755 0.8172 0.7621 0.7270 0.7270 0.6931 0.7270 0.6604 0.6931 0.7270 0.6286 0.6766 0.9589 0.8557 0.9589 0.8362 0.8957 0.8557 0.9373 0.8557 0.8755 0.4970 0.5680 0.5828 0.5680 0.5534 0.5248 …
SJrecm-04	0.7985 0.7621 0.9589 0.8755 0.9589 0.8755 0.9589 0.8755 0.8755 0.7985 0.6286 0.6286 0.6604 0.5978 0.3567 0.4308 0.3102 0.5108 0.4308 0.4055 0.5108 0.5390 0.8755 0.9163 0.7985 0.8755 0.8362 0.9163 0.7621 0.8362 0.8755 0.8172 0.6931 0.6604 0.6604 0.6286 0.6604 0.5978 0.6286 0.6604 0.5680 0.6131 0.9589 0.8557 0.9589 0.8362 0.8957 0.8557 0.9373 0.8557 0.8755 0.4970 0.5680 0.5248 0.5108 0.6131 0.4700 …
SJrecm-05	0.7621 0.7270 1.0033 0.9163 1.0033 0.9163 1.0033 0.9163 0.9163 0.8362 0.7270 0.7270 0.7621 0.6286 0.3808 0.4568 0.3331 0.4834 0.4055 0.3808 0.4834 0.5680 0.9163 0.9589 0.8362 0.9163 0.8755 0.9589 0.7985 0.8755 0.9163 0.8557 0.7270 0.6931 0.6931 0.6604 0.6931 0.6286 0.6604 0.6931 0.5978 0.6444 0.9163 0.8172 0.9163 0.7985 0.8557 0.8172 0.8957 0.8172 0.8362 0.5248 0.5978 0.4970 0.4834 0.7100 0.4437 …
SJrecm-06	0.7621 0.7270 1.0033 0.9163 1.0033 0.9163 1.0033 0.9163 0.9163 0.6931 0.5978 0.5978 0.6286 0.5108 0.3808 0.4568 0.3331 0.4834 0.4055 0.3808 0.4834 0.5680 0.7621 0.7985 0.6931 0.7621 0.7270 0.7985 0.6604 0.7270 0.7621 0.7100 0.7270 0.6931 0.6931 0.6604 0.6931 0.6286 0.6604 0.6931 0.5978 0.6444 0.9163 0.8172 0.9163 0.7985 0.8557 0.8172 0.8957 0.8172 0.8362 0.5248 0.5978 0.6131 0.5978 0.5828 0.5534 …
SJrecm-07	0.7621 0.7270 1.0033 0.9163 1.0033 0.9163 1.0033 0.9163 0.9163 0.9163 0.6604 0.6604 0.6931 0.5680 0.3808 0.4568 0.3331 0.4834 0.4055 0.3808 0.4834 0.5680 1.0033 1.0498 0.9163 1.0033 0.9589 1.0498 0.8755 0.9589 1.0033 0.9373 0.6604 0.6286 0.6286 0.5978 0.6286 0.5680 0.5978 0.6286 0.5390 0.5828 0.9163 0.8172 0.9163 0.7985 0.8557 0.8172 0.8957 0.8172 0.8362 0.5248 0.5978 0.6766 0.6604 0.6444 0.4970 …
SArecm-01	0.6286 0.5978 0.5680 0.6286 0.5680 0.6286 0.5680 0.6286 0.6286 0.4568 0.8755 0.8755 0.7621 0.8362 0.8755 0.7621 0.9589 0.8755 0.9163 0.8755 0.8755 0.7621 0.5680 0.5978 0.5680 0.6931 0.6604 0.5978 0.5978 0.7270 0.5680 0.6766 0.5390 0.5108 0.5680 0.5390 0.5680 0.5108 0.5978 0.5680 0.5390 0.6131 0.6286 0.7100 0.5978 0.7270 0.6444 0.7444 0.6131 0.7444 0.6931 0.9808 1.1499 0.8172 0.8362 0.7802 0.7444 …
S71-01	0.5534 0.5248 0.5828 0.6444 0.5828 0.6444 0.5828 0.6444 0.6444 0.5248 0.9808 0.8957 1.0263 0.8557 0.6766 0.7802 0.6766 0.5534 0.6444 0.6766 0.5534 0.8172 0.4180 0.4437 0.3930 0.4970 0.4437 0.4437 0.4180 0.4700 0.3930 0.4834 0.5248 0.5248 0.5534 0.5534 0.5828 0.5248 0.5828 0.5828 0.5534 0.5680 0.4700 0.5108 0.4970 0.5248 0.4834 0.5108 0.5108 0.5108 0.5248 0.9163 1.1239 0.9163 0.9373 0.9163 0.8755 …
S71-02	0.5248 0.4970 0.5534 0.6131 0.5534 0.6131 0.5534 0.6131 0.6131 0.4970 0.9373 0.8557 0.9808 0.8172 0.6444 0.7444 0.6444 0.5248 0.6131 0.6444 0.5248 0.7802 0.4437 0.4700 0.4180 0.4700 0.4700 0.4180 0.3930 0.4970 0.3687 0.4568 0.4970 0.4970 0.5248 0.5248 0.5534 0.4970 0.5534 0.5534 0.5248 0.5390 0.4970 0.5390 0.5248 0.5534 0.5108 0.5390 0.5390 0.5390 0.5534 0.9589 1.1766 0.8755 0.8957 0.8755 0.8362 …
S71-03	0.5828 0.5534 0.5534 0.6131 0.5534 0.6131 0.5534 0.6131 0.6131 0.4970 1.0263 0.9373 1.0739 0.8957 0.7100 0.8172 0.7100 0.5828 0.6766 0.7100 0.5828 0.8557 0.3930 0.4180 0.3687 0.4700 0.4180 0.4180 0.3930 0.4437 0.3687 0.4568 0.5534 0.5534 0.5828 0.5828 0.6131 0.5534 0.6131 0.6131 0.5828 0.5978 0.4970 0.5390 0.5248 0.5534 0.5108 0.5390 0.5390 0.5390 0.5534 0.9589 1.1766 0.9589 0.9808 0.9589 0.9163 …
S71-04	0.5248 0.4970 0.5534 0.6131 0.5534 0.6131 0.5534 0.6131 0.6131 0.4970 0.9373 0.8557 0.9808 0.8172 0.7100 0.7444 0.7100 0.5248 0.6766 0.6444 0.5248 0.8557 0.3930 0.4180 0.3687 0.5248 0.4700 0.4700 0.4437 0.4970 0.4180 0.5108 0.4970 0.4970 0.5248 0.5248 0.5534 0.4970 0.5534 0.5534 0.5248 0.5390 0.4437 0.4834 0.4700 0.4970 0.4568 0.4834 0.4834 0.4834 0.4970 0.9589 1.1766 0.9589 0.9808 0.9589 0.9163 …
S71-05	0.5534 0.5248 0.5828 0.6444 0.5828 0.6444 0.5828 0.6444 0.6444 0.5248 0.9808 0.8957 1.0263 0.8557 0.6766 0.7802 0.6766 0.5534 0.6444 0.6766 0.5534 0.8172 0.4180 0.4437 0.3930 0.4970 0.4437 0.4437 0.4180 0.4700 0.3930 0.4834 0.5248 0.5248 0.5534 0.5534 0.5828 0.5248 0.5828 0.5828 0.5534 0.5680 0.4700 0.5108 0.4970 0.5248 0.4834 0.5108 0.5108 0.5108 0.5248 0.9163 1.1239 0.9163 0.9373 0.9163 0.8755 …
S71-06	0.5534 0.5248 0.5828 0.6444 0.5828 0.6444 0.5828 0.6444 0.6444 0.5248 0.9808 0.8957 1.0263 0.8557 0.6766 0.7802 0.6766 0.5534 0.6444 0.6766 0.5534 0.8172 0.4180 0.4437 0.3930 0.4970 0.4437 0.4437 0.4180 0.4700 0.3930 0.4834 0.5248 0.5248 0.5534 0.5534 0.5828 0.5248 0.5828 0.5828 0.5534 0.5680 0.4700 0.5108 0.4970 0.5248 0.4834 0.5108 0.5108 0.5108 0.5248 0.9163 1.1239 0.9163 0.9373 0.9163 0.8755 …
S71-07	0.5534 0.5248 0.5828 0.6444 0.5828 0.6444 0.5828 0.6444 0.6444 0.5248 0.9808 0.8957 1.0263 0.8557 0.6766 0.7802 0.6766 0.5534 0.6444 0.6766 0.5534 0.8172 0.4180 0.4437 0.3930 0.4970 0.4437 0.4437 0.4180 0.4700 0.3930 0.4834 0.5248 0.5248 0.5534 0.5534 0.5828 0.5248 0.5828 0.5828 0.5534 0.5680 0.4700 0.5108 0.4970 0.5248 0.4834 0.5108 0.5108 0.5108 0.5248 0.9163 1.1239 0.9163 0.9373 0.9163 0.8755 …
Nei's genetic identity (above diagonal) and genetic distance (below diagonal).
[truncated: 23 more columns]
